# Supplementary material for: Phase Angle: A Possible Biomarker to Quantify Inflammation in Subjects with Obesity and 25(OH)D Deficiency
Source: Nutrients. 2019 Jul 29;11(8):1747. doi: 10.3390/nu11081747 (PMC6723101; doi:10.3390/nu11081747)
Supplement: Supplementary file 1 [file nutrients-11-01747-s001.pdf]

**Table S1.** Lifestyle habits of participants grouped on the basis of BMI categories.

| Parameters              | Normal weight<br>n=79; 17.3% | Over weight<br>n=89; 19.5% | Grade I obesity<br>n=86; 18.9% | Grade II obesity<br>n=91; 20.0% | Grade III obesity<br>n=110; 24.1% | p-value      |
|-------------------------|------------------------------|----------------------------|--------------------------------|---------------------------------|-----------------------------------|--------------|
| Age (years)             | 36±11.2                      | 35±11.2                    | 37±12.5                        | 36±11.1                         | 36±9.9                            | 0.88         |
| Smoking (yes)           |                              |                            |                                |                                 |                                   |              |
| Yes                     | 28, 35.4%                    | 26, 29.2%                  | 30, 34.9%                      | 25, 27.5%                       | 37, 33.6%                         | $\chi^2=2.1$ |
| No                      | 51, 64.6%                    | 63, 70.8%                  | 56, 65.1%                      | 66, 72.5%                       | 73, 66.4%                         | $p=0.72$     |
| Physical activity (yes) |                              |                            |                                |                                 |                                   |              |
| Yes                     | 16, 20.3%                    | 24, 27.0%                  | 31, 36.0%                      | 25, 27.5%                       | 22, 20.0%                         | $\chi^2=8.1$ |
| No                      | 63, 79.7%                    | 65, 73.0%                  | 55, 64.0%                      | 66, 72.5%                       | 88, 80.0%                         | $p=0.09$     |

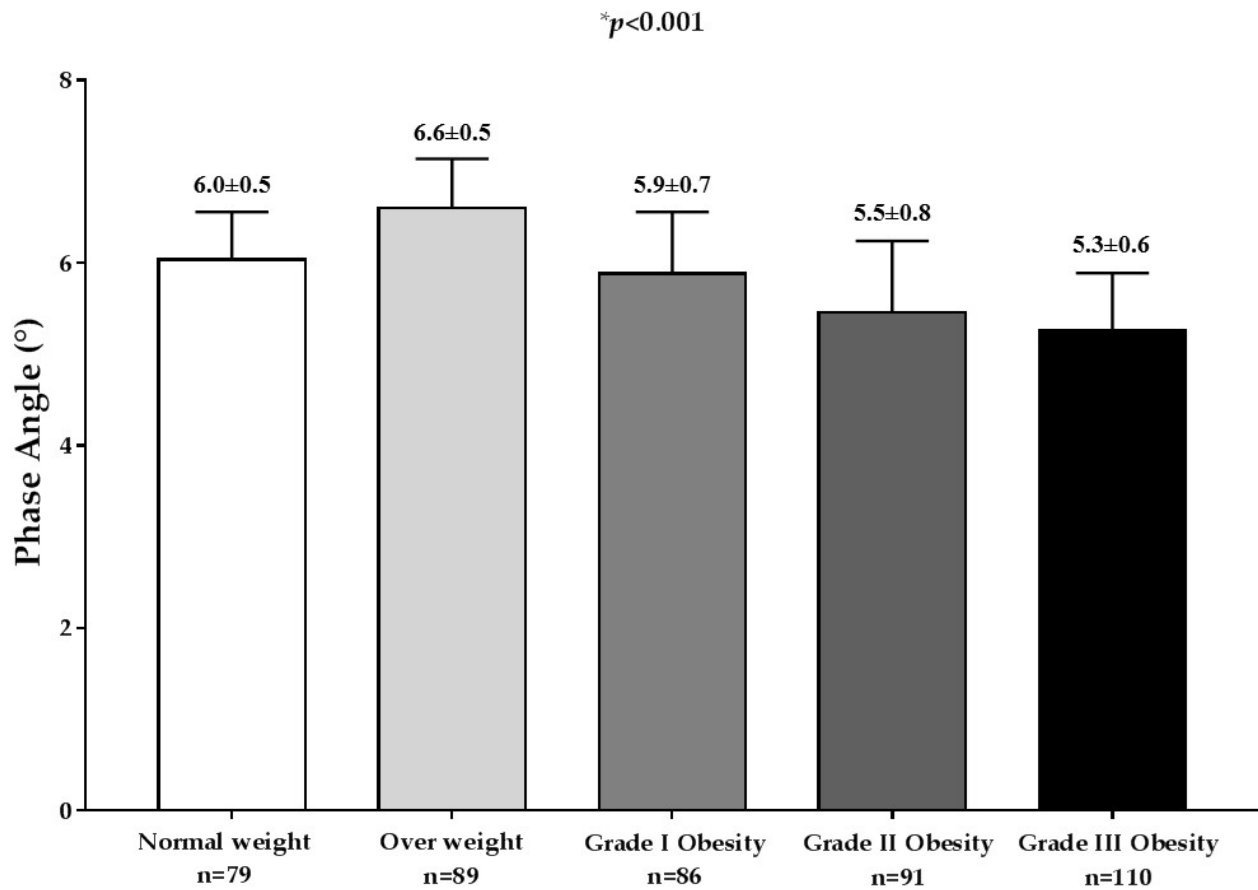

**Figure S1.** The difference of PhA across all body mass index (BMI) categories. A  $p$  value in bold type denotes a significant difference (\* $p < 0.05$ ).
